# Supplementary material for: Study on the Brill transition of polyamide 6 with different crystal forms using low- and high-frequency Raman spectroscopy
Source: Royal Society of Chemistry journal article supplement (doi:10.1039/d4ra08523j), 2025-01-01
Supplement: d4ra08523j1.pdf [file d4ra08523j1.pdf]

## Supplementary Information

Study on the Brill transition of polyamide 6 with different  
crystal forms using low- and high-frequency Raman  
spectroscopy

Jiacheng Gao <sup>a</sup> and Harumi Sato <sup>\*a</sup>

<sup>a</sup> *Graduate School of Human Development and Environment,  
Kobe University, 3-11, Tsurukabuto, Nada-ku, Kobe, Hyogo,  
657-0011, Japan.*

\* To whom all correspondence should be addressed.

E-mail: [hsato@tiger.kobe-u.ac.jp](mailto:hsato@tiger.kobe-u.ac.jp)

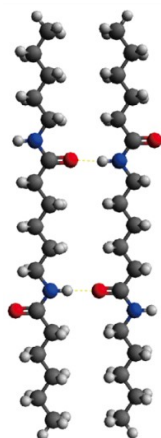

Fig. S1. A molecular fragment comprising two neighboring PA6 chains, each capped with methyl groups and consisting of two monomer units, used for optimization calculations. The resulting atomic tensors are subsequently transferred back to the original long chains.

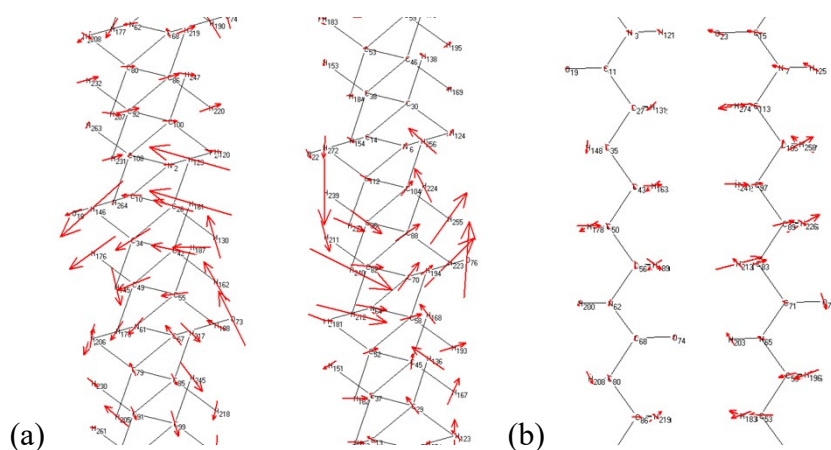

Fig. S2. Atomic motions of the Raman active modes of  $\alpha$ -PA6 calculated at around (a)  $70\text{ cm}^{-1}$  (overhead view along the  $c$  axis) and (b)  $110\text{ cm}^{-1}$ .



|      |           |           |           |      |           |           |           |
|------|-----------|-----------|-----------|------|-----------|-----------|-----------|
| 55 H | -1.244877 | 15.983398 | 0.737835  | 74 H | 3.825611  | -0.275937 | 0.603476  |
| 56 H | 3.552664  | 9.941923  | 0.7223    | 75 H | 4.057985  | -0.157572 | -1.129967 |
| 57 H | 4.152374  | 10.021516 | -0.927759 | 76 H | 4.098895  | 17.306051 | -1.297354 |
| 58 H | 1.0432    | 15.009934 | 0.996987  | 77 H | 4.788724  | 18.169321 | 0.081755  |
| 59 H | 1.277968  | 15.079562 | -0.744724 | 78 H | 3.318916  | 17.210835 | 0.286626  |
| 60 H | 6.261814  | 11.120224 | -0.114064 | 79 H | 0.684303  | 7.322415  | 1.010952  |
| 61 H | 5.663909  | 11.028353 | 1.535737  | 80 H | 1.236679  | 7.404975  | -0.657194 |
| 62 H | -1.102126 | 13.654556 | -0.375298 | 81 H | 5.985452  | 1.403774  | -0.770767 |
| 63 H | 3.651678  | 12.397169 | 0.359939  | 82 H | 5.757562  | 1.271385  | 0.971888  |
| 64 H | -0.76011  | 11.297184 | -1.099182 | 83 H | -1.423117 | 6.187243  | 0.27466   |
| 65 H | -1.157247 | 11.290789 | 0.608716  | 84 H | -0.911232 | 6.323593  | -1.401669 |
| 66 H | 3.496715  | 14.593277 | 0.193774  | 85 H | 3.706164  | 2.395507  | -1.013277 |
| 67 H | 4.25862   | 14.7441   | -1.382324 | 86 H | 3.431623  | 2.210987  | 0.713981  |
| 68 H | 0.864404  | 9.913867  | 1.095549  | 87 H | -0.998292 | -1.355849 | 0.476067  |
| 69 H | 1.332882  | 9.972906  | -0.589218 | 88 H | 0.526434  | -2.093296 | -0.034033 |
| 70 H | 6.113654  | 16.081095 | -0.365819 | 89 H | -0.490803 | -1.252406 | -1.2117   |
| 71 H | 5.332279  | 15.991061 | 1.197147  | 90 H | 6.123558  | -1.281727 | 0.851036  |
| 72 H | -0.777868 | 8.798572  | -1.239599 | 91 H | 6.359356  | -1.161421 | -0.896902 |
| 73 H | -1.284895 | 8.751408  | 0.439852  | 92 H | 5.119726  | -2.237963 | -0.244199 |

Table S2. Computational and experimental vibrational frequencies and the assignments of main bands presented in Fig. 2.

| Computational frequency (cm <sup>-1</sup> ) | Experimental frequency (cm <sup>-1</sup> ) | Assignment                       |
|---------------------------------------------|--------------------------------------------|----------------------------------|
| 1160                                        | 1126                                       | C-C stretching ( <i>trans</i> )  |
| 1105                                        | 1080                                       | C-C stretching ( <i>gauche</i> ) |
| 1090                                        | 1060                                       | C-C stretching ( <i>trans</i> )  |
| 113                                         |                                            | CH <sub>2</sub> lateral motion   |
| 110                                         | 100                                        | C=O and N-H stretching           |
| 107                                         |                                            |                                  |
| 72                                          |                                            |                                  |
| 63                                          | 60                                         | Backbone rotational motion       |
